# Supplementary material for: Bust economics: foragers choose high quality habitats in lean times
Source: PubMed Central journal article supplement (PMC4734440; doi:10.7717/peerj.1609), 2016-01-21
Supplement: peerj-04-1609-s003.pdf [file peerj-04-1609-s003.pdf]

| DATE      | ROUND | SYSTEM | CARDIANL | TREATMENT | SPECIES | ID       | INITIAL DENSITY | GUD |
|-----------|-------|--------|----------|-----------|---------|----------|-----------------|-----|
| 6-Apr-15  | 1     | A      | W        | LOW       | SH      | BSH0504  | 3               | 3   |
| 6-Apr-15  | 1     | A      | N        | MEDIUM    | SH      | BSH0504  | 6               | 4   |
| 6-Apr-15  | 1     | A      | E        | HIGH      | SH      | BSH0504  | 9               | 8   |
| 6-Apr-15  | 1     | B      | N        | HIGH      | LD      | 2SY0404  | 9               | 6   |
| 6-Apr-15  | 1     | B      | E        | LOW       | LD      | 2SY0404  | 3               | 3   |
| 6-Apr-15  | 1     | B      | S        | MEDIUM    | LD      | 2SY0404  | 6               | 6   |
| 6-Apr-15  | 2     | A      | W        | LOW       | LD      | BSY0504  | 3               | 3   |
| 6-Apr-15  | 2     | A      | N        | MEDIUM    | LD      | BSY0504  | 6               | 6   |
| 6-Apr-15  | 2     | A      | E        | HIGH      | LD      | BSY0504  | 9               | 5   |
| 6-Apr-15  | 2     | B      | N        | HIGH      | LD      | ISY0604  | 9               | 6   |
| 6-Apr-15  | 2     | B      | E        | LOW       | LD      | ISY0604  | 3               | 3   |
| 6-Apr-15  | 2     | B      | S        | MEDIUM    | LD      | ISY0604  | 6               | 5   |
| 5-Apr-15  | 2     | A      | W        | LOW       | LD      | 2SY0404  | 3               | 3   |
| 5-Apr-15  | 2     | A      | N        | MEDIUM    | LD      | 2SY0404  | 6               | 3   |
| 5-Apr-15  | 2     | A      | E        | HIGH      | LD      | 2SY0404  | 9               | 4   |
| 5-Apr-15  | 2     | B      | N        | HIGH      | LD      | DSY0504  | 9               | 3   |
| 5-Apr-15  | 2     | B      | E        | LOW       | LD      | DSY0504  | 3               | 3   |
| 5-Apr-15  | 2     | B      | S        | MEDIUM    | LD      | DSY0504  | 6               | 2   |
| 5-Apr-15  | 3     | B      | N        | HIGH      | SH      | BSH0504  | 9               | 5   |
| 5-Apr-15  | 3     | B      | E        | LOW       | SH      | BSH0504  | 3               | 3   |
| 5-Apr-15  | 3     | B      | S        | MEDIUM    | SH      | BSH0504  | 6               | 3   |
| 7-Apr-15  | 2     | B      | N        | HIGH      | LD      | 7SY0704  | 9               | 6   |
| 7-Apr-15  | 2     | B      | E        | LOW       | LD      | 7SY0704  | 3               | 3   |
| 7-Apr-15  | 2     | B      | S        | MEDIUM    | LD      | 7SY0704  | 6               | 3   |
| 7-Apr-15  | 3     | A      | W        | LOW       | LD      | ISY0604  | 3               | 3   |
| 7-Apr-15  | 3     | A      | N        | MEDIUM    | LD      | ISY0604  | 6               | 5   |
| 7-Apr-15  | 3     | A      | E        | HIGH      | LD      | ISY0604  | 9               | 8   |
| 8-Apr-15  | 1     | A      | W        | LOW       | LD      | 7SY0704  | 3               | 3   |
| 8-Apr-15  | 1     | A      | N        | MEDIUM    | LD      | 7SY0704  | 6               | 4   |
| 8-Apr-15  | 1     | A      | E        | HIGH      | LD      | 7SY0704  | 9               | 7   |
| 8-Apr-15  | 1     | B      | N        | HIGH      | SH      | FSH0804  | 9               | 6   |
| 8-Apr-15  | 1     | B      | E        | LOW       | SH      | FSH0804  | 3               | 3   |
| 8-Apr-15  | 1     | B      | S        | MEDIUM    | SH      | FSH0804  | 6               | 6   |
| 8-Apr-15  | 2     | A      | W        | LOW       | LD      | 11SY0804 | 3               | 2   |
| 8-Apr-15  | 2     | A      | N        | MEDIUM    | LD      | 11SY0804 | 6               | 4   |
| 8-Apr-15  | 2     | A      | E        | HIGH      | LD      | 11SY0804 | 9               | 5   |
| 9-Apr-15  | 1     | A      | W        | LOW       | SH      | BSH0804  | 3               | 0   |
| 9-Apr-15  | 1     | A      | N        | MEDIUM    | SH      | BSH0804  | 6               | 5   |
| 9-Apr-15  | 1     | A      | E        | HIGH      | SH      | BSH0804  | 9               | 6   |
| 9-Apr-15  | 1     | B      | N        | HIGH      | LD      | 11SY0804 | 9               | 5   |
| 9-Apr-15  | 1     | B      | E        | LOW       | LD      | 11SY0804 | 3               | 1   |
| 9-Apr-15  | 1     | B      | S        | MEDIUM    | LD      | 11SY0804 | 6               | 5   |
| 10-Apr-15 | 1     | A      | W        | LOW       | SH      | 8SH1004  | 3               | 3   |
| 10-Apr-15 | 1     | A      | N        | MEDIUM    | SH      | 8SH1004  | 6               | 4   |
| 10-Apr-15 | 1     | A      | E        | HIGH      | SH      | 8SH1004  | 9               | 4   |
| 11-Apr-15 | 1     | A      | W        | LOW       | SH      | 7SH1104  | 3               | 3   |

|           |     |   |        |    |          |   |   |
|-----------|-----|---|--------|----|----------|---|---|
| 11-Apr-15 | 1 A | N | MEDIUM | SH | 7SH1104  | 6 | 6 |
| 11-Apr-15 | 1 A | E | HIGH   | SH | 7SH1104  | 9 | 8 |
| 11-Apr-15 | 1 B | N | HIGH   | SH | 8SH1004  | 9 | 5 |
| 11-Apr-15 | 1 B | E | LOW    | SH | 8SH1004  | 3 | 2 |
| 11-Apr-15 | 1 B | S | MEDIUM | SH | 8SH1004  | 6 | 2 |
| 13-Apr-15 | 1 A | W | LOW    | SH | 3CSH1304 | 3 | 3 |
| 13-Apr-15 | 1 A | N | MEDIUM | SH | 3CSH1304 | 6 | 1 |
| 13-Apr-15 | 1 A | E | HIGH   | SH | 3CSH1304 | 9 | 5 |
| 13-Apr-15 | 1 B | N | HIGH   | SH | 4DSH1304 | 9 | 3 |
| 13-Apr-15 | 1 B | E | LOW    | SH | 4DSH1304 | 3 | 1 |
| 13-Apr-15 | 1 B | S | MEDIUM | SH | 4DSH1304 | 6 | 1 |
| 13-Apr-15 | 2 A | W | LOW    | SH | 4ASH1304 | 3 | 3 |
| 13-Apr-15 | 2 A | N | MEDIUM | SH | 4ASH1304 | 6 | 3 |
| 13-Apr-15 | 2 A | E | HIGH   | SH | 4ASH1304 | 9 | 0 |
| 13-Apr-15 | 2 B | N | HIGH   | SH | 5ASH1304 | 9 | 5 |
| 13-Apr-15 | 2 B | E | LOW    | SH | 5ASH1304 | 3 | 0 |
| 13-Apr-15 | 2 B | S | MEDIUM | SH | 5ASH1304 | 6 | 6 |
| 13-Apr-15 | 3 A | W | LOW    | SY | 3BSY1304 | 3 | 3 |
| 13-Apr-15 | 3 A | N | MEDIUM | SY | 3BSY1304 | 6 | 5 |
| 13-Apr-15 | 3 A | E | HIGH   | SY | 3BSY1304 | 9 | 8 |
| 13-Apr-15 | 3 B | N | HIGH   | SY | 4BSY1304 | 9 | 1 |
| 13-Apr-15 | 3 B | E | LOW    | SY | 4BSY1304 | 3 | 2 |
| 13-Apr-15 | 3 B | S | MEDIUM | SY | 4BSY1304 | 6 | 3 |
| 13-Apr-15 | 4 A | W | LOW    | SY | 4ASY1304 | 3 | 3 |
| 13-Apr-15 | 4 A | N | MEDIUM | SY | 4ASY1304 | 6 | 4 |
| 13-Apr-15 | 4 A | E | HIGH   | SY | 4ASY1304 | 9 | 2 |
| 13-Apr-15 | 4 B | N | HIGH   | SY | 3ASY1304 | 9 | 1 |
| 13-Apr-15 | 4 B | E | LOW    | SY | 3ASY1304 | 3 | 3 |
| 13-Apr-15 | 4 B | S | MEDIUM | SY | 3ASY1304 | 6 | 5 |
| 13-Apr-15 | 5 A | W | LOW    | SH | 8SH1204  | 3 | 0 |
| 13-Apr-15 | 5 A | N | MEDIUM | SH | 8SH1204  | 6 | 1 |
| 13-Apr-15 | 5 A | E | HIGH   | SH | 8SH1204  | 9 | 4 |
| 14-Apr-15 | 1 A | W | LOW    | SY | 3ASY1304 | 3 | 3 |
| 14-Apr-15 | 1 A | N | MEDIUM | SY | 3ASY1304 | 6 | 3 |
| 14-Apr-15 | 1 A | E | HIGH   | SY | 3ASY1304 | 9 | 7 |
| 14-Apr-15 | 1 B | N | HIGH   | SY | 4ASY1304 | 9 | 7 |
| 14-Apr-15 | 1 B | E | LOW    | SY | 4ASY1304 | 3 | 3 |
| 14-Apr-15 | 1 B | S | MEDIUM | SY | 4ASY1304 | 6 | 3 |
| 14-Apr-15 | 2 A | W | LOW    |    | 4DSH1304 | 3 | 1 |
| 14-Apr-15 | 2 A | N | MEDIUM |    | 4DSH1304 | 6 | 5 |
| 14-Apr-15 | 2 A | E | HIGH   |    | 4DSH1304 | 9 | 8 |
| 14-Apr-15 | 2 B | N | HIGH   |    | 3CSH1304 | 9 | 7 |
| 14-Apr-15 | 2 B | E | LOW    |    | 3CSH1304 | 3 | 2 |
| 14-Apr-15 | 2 B | S | MEDIUM |    | 3CSH1304 | 6 | 5 |
| 14-Apr-15 | 3 A | W | LOW    |    | 5ASH1304 | 3 | 3 |
| 14-Apr-15 | 3 A | N | MEDIUM |    | 5ASH1304 | 6 | 5 |
| 14-Apr-15 | 3 A | E | HIGH   |    | 5ASH1304 | 9 | 8 |

|           |     |   |        |          |   |   |
|-----------|-----|---|--------|----------|---|---|
| 14-Apr-15 | 3 B | N | HIGH   | 4ASH1304 | 9 | 5 |
| 14-Apr-15 | 3 B | E | LOW    | 4ASH1304 | 3 | 3 |
| 14-Apr-15 | 3 B | S | MEDIUM | 4ASH1304 | 6 | 2 |
| 14-Apr-15 | 4 A | W | LOW    | 4BSY1304 | 3 | 2 |
| 14-Apr-15 | 4 A | N | MEDIUM | 4BSY1304 | 6 | 5 |
| 14-Apr-15 | 4 A | E | HIGH   | 4BSY1304 | 9 | 6 |

PROP\_HARTOTAL\_FO COMMENTS

|          |             |
|----------|-------------|
| 0        | 0           |
| 0.333333 | 2           |
| 0.111111 | 1           |
| 0.333333 | 3           |
| 0        | 0           |
| 0        | 0           |
| 0        | 0           |
| 0        | 0           |
| 0.444444 | 4           |
| 0.333333 | 3           |
| 0        | 0           |
| 0.166667 | 1           |
| 0        | 0           |
| 0.5      | 3           |
| 0.555556 | 5           |
| 0.666667 | 6           |
| 0        | 0           |
| 0.666667 | 4           |
| 0.444444 | 4           |
| 0        | 0           |
| 0.5      | 3           |
| 0.333333 | 3           |
| 0        | 0           |
| 0.5      | 3           |
| 0        | 0           |
| 0.166667 | 1           |
| 0.111111 | 1           |
| 0        | 0           |
| 0.333333 | 2           |
| 0.222222 | 2           |
| 0.333333 | 3           |
| 0        | 0           |
| 0        | 0           |
| 0.333333 | 1           |
| 0.333333 | 2           |
| 0.444444 | 4           |
| 1        | 3 3 HOURS   |
| 0.166667 | 1 3 HOURS   |
| 0.333333 | 3 3 HOURS   |
| 0.444444 | 4 3 HOURS   |
| 0.666667 | 2 3 HOURS   |
| 0.166667 | 1 3 HOURS   |
| 0        | 0           |
| 0.333333 | 2           |
| 0.555556 | 5           |
| 0        | 0 UNFORAGED |

|          |             |
|----------|-------------|
| 0        | 0 UNFORAGED |
| 0.111111 | 1 UNFORAGED |
| 0.444444 | 4           |
| 0.333333 | 1           |
| 0.666667 | 4           |
| 0        | 0           |
| 0.833333 | 5           |
| 0.444444 | 4           |
| 0.666667 | 6           |
| 0.666667 | 2           |
| 0.833333 | 5           |
| 0        | 0           |
| 0.5      | 3           |
| 1        | 9           |
| 0.444444 | 4           |
| 1        | 3           |
| 0        | 0           |
| 0        | 0 LATHARGIC |
| 0.166667 | 1 LATHARGIC |
| 0.111111 | 1 LATHARGIC |
| 0.888889 | 8           |
| 0.333333 | 1           |
| 0.5      | 3           |
| 0        | 0           |
| 0.333333 | 2           |
| 0.777778 | 7           |
| 0.888889 | 8           |
| 0        | 0           |
| 0.166667 | 1           |
| 1        | 3           |
| 0.833333 | 5           |
| 0.555556 | 5           |
| 0        | 0           |
| 0.5      | 3           |
| 0.222222 | 2           |
| 0.222222 | 2           |
| 0        | 0           |
| 0.5      | 3           |
| 0.666667 | 2           |
| 0.166667 | 1           |
| 0.111111 | 1           |
| 0.222222 | 2           |
| 0.333333 | 1           |
| 0.166667 | 1           |
| 0        | 0 ESACPED   |
| 0.166667 | 1 ESACPED   |
| 0.111111 | 1 ESACPED   |

|          |   |
|----------|---|
| 0.444444 | 4 |
| 0        | 0 |
| 0.666667 | 4 |
| 0.333333 | 1 |
| 0.166667 | 1 |
| 0.333333 | 3 |
